# Supplementary material for: Graphene oxide-encapsulated carbon nanotube hybrids for high dielectric performance nanocomposites with enhanced energy storage density
Source: Royal Society of Chemistry journal article supplement (doi:10.1039/c3nr00625e), 2013-01-01
Supplement: c3nr00625e.pdf [file c3nr00625e.pdf]

## Supporting Information

Graphene oxide-encapsulated carbon nanotube hybrids for high dielectric performance nanocomposites with enhanced energy storage density

*Chao Wu, Xingyi Huang\*, Xinfeng Wu, Liyuan Xie, Ke Yang, Pingkai Jiang\**

Department of Polymer Science and Engineering, Shanghai Key Lab of Electrical Insulation and Thermal Aging, Shanghai Jiao Tong University, Shanghai 200240, China.

Corresponding author, Electronic mail: [xyhuang@sjtu.edu.cn](mailto:xyhuang@sjtu.edu.cn); [pkjiang@sjtu.edu.cn](mailto:pkjiang@sjtu.edu.cn)

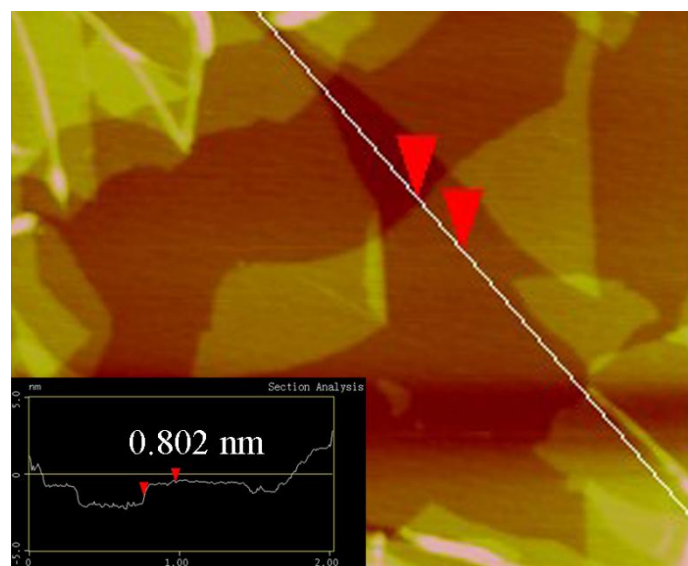

**Figure S1.** Typical AFM image of graphene oxide (GO)

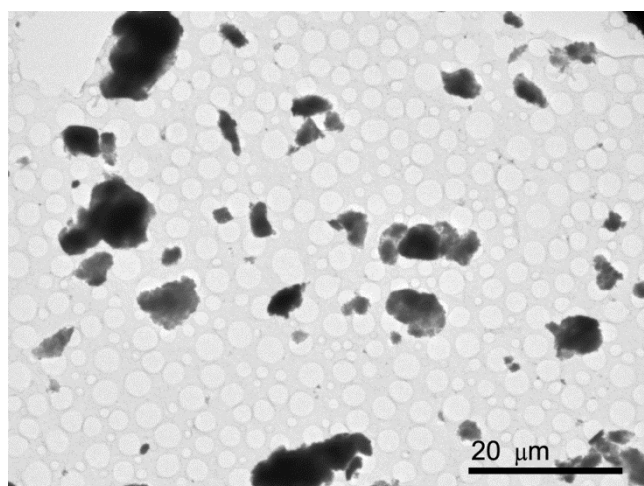

**Figure S2.** Representative TEM images of hydroxyl CNTs.

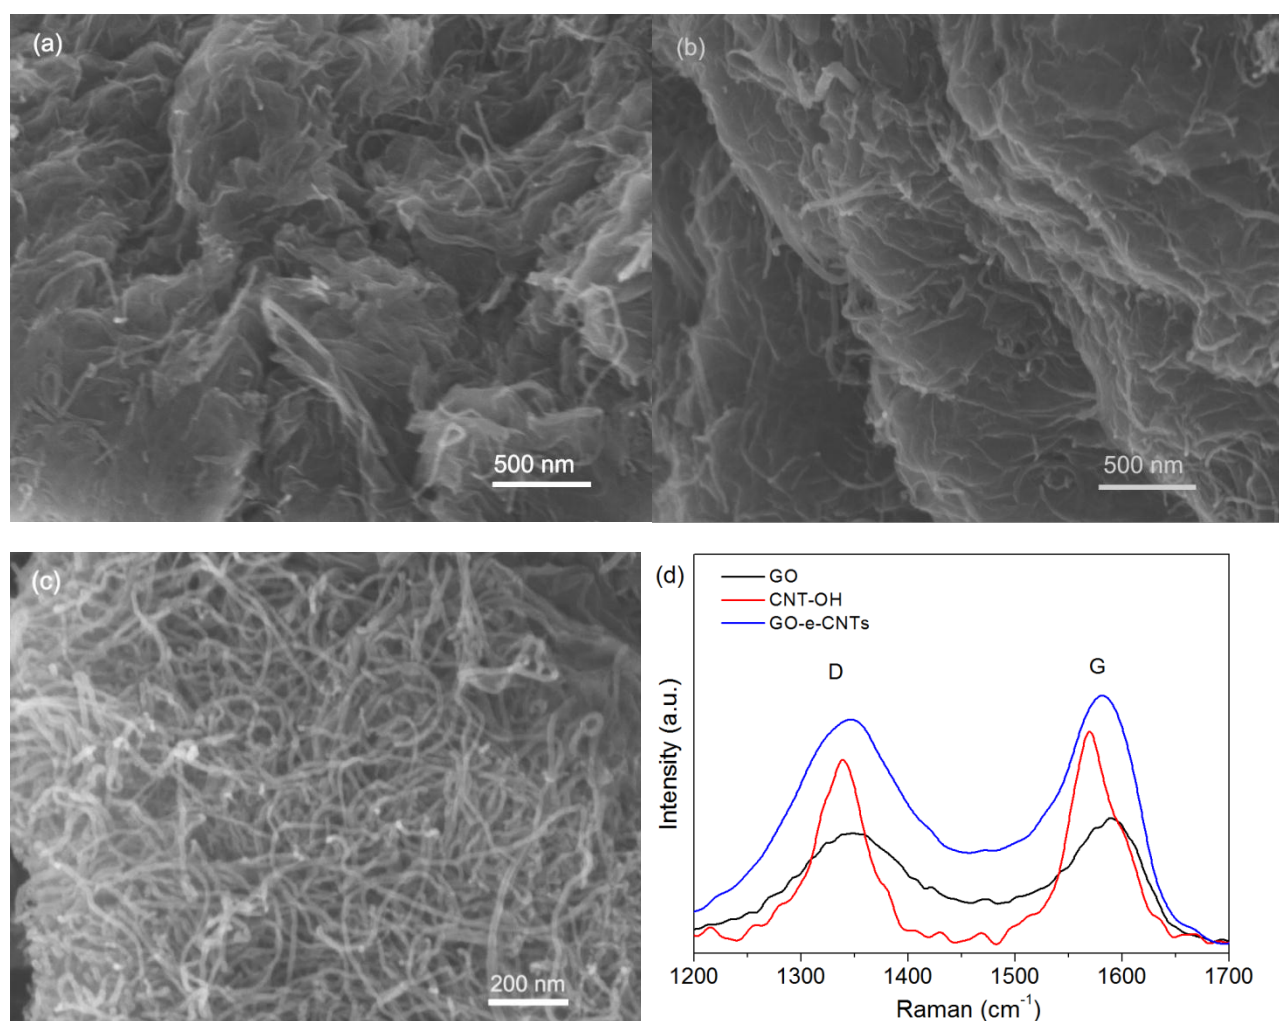

**Figure S3.** a,b) SEM images of in-site reduced GO-e-CNTs, clearly showing that the CNTs are encapsulated by the reduced GO sheets; Mass ratio of GO and CNT is 1 for GO-e-CNTs. c) SEM image of CNT-OH; d) Raman spectra of GO, CNT-OH and GO-e-CNTs.

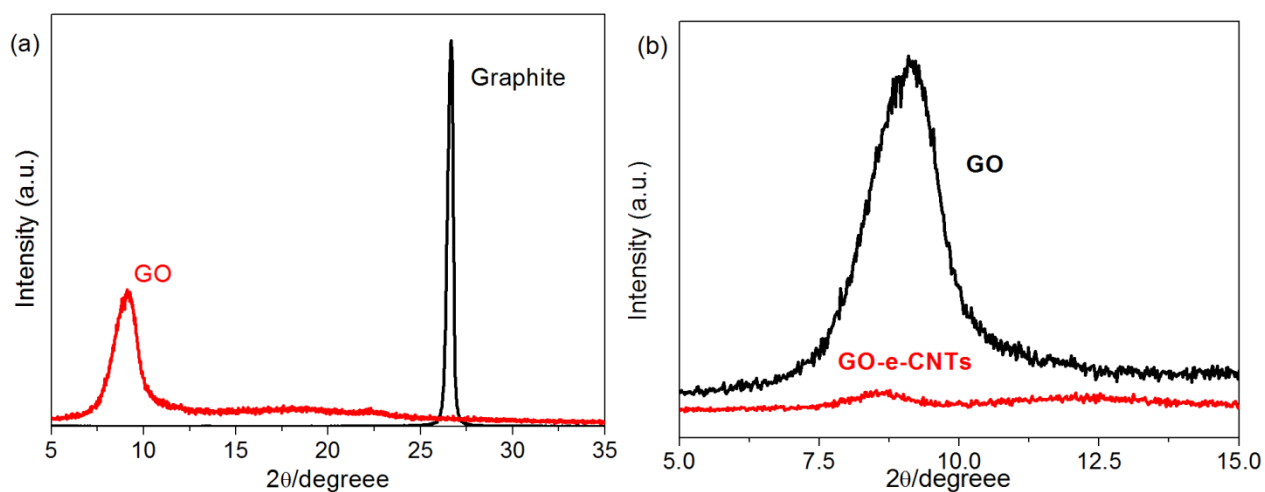

**Figure S4.** (a) XRD patterns of graphene oxide (GO) and graphite, (b) XRD patterns of GO and GO-e-CNTs. The weight ratio of GO and CNTs is 1:1.

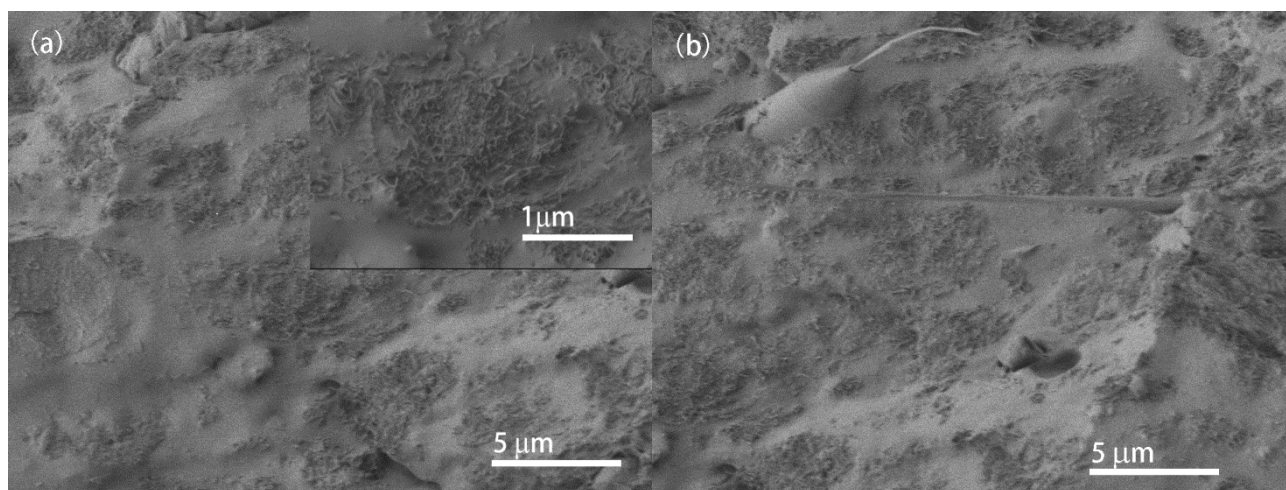

**Figure S5.** Representative SEM images of the CNT composites with a) 15 wt% and b) 20 wt% CNTs.

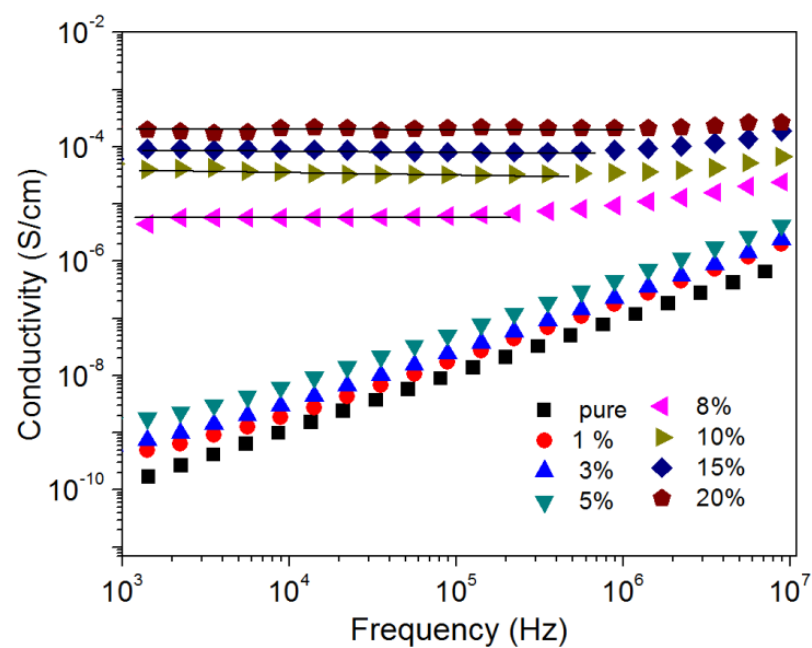

**Figure S6.** Frequency-dependent electrical conductivity of the pristine CNT composites with various loadings of CNTs.

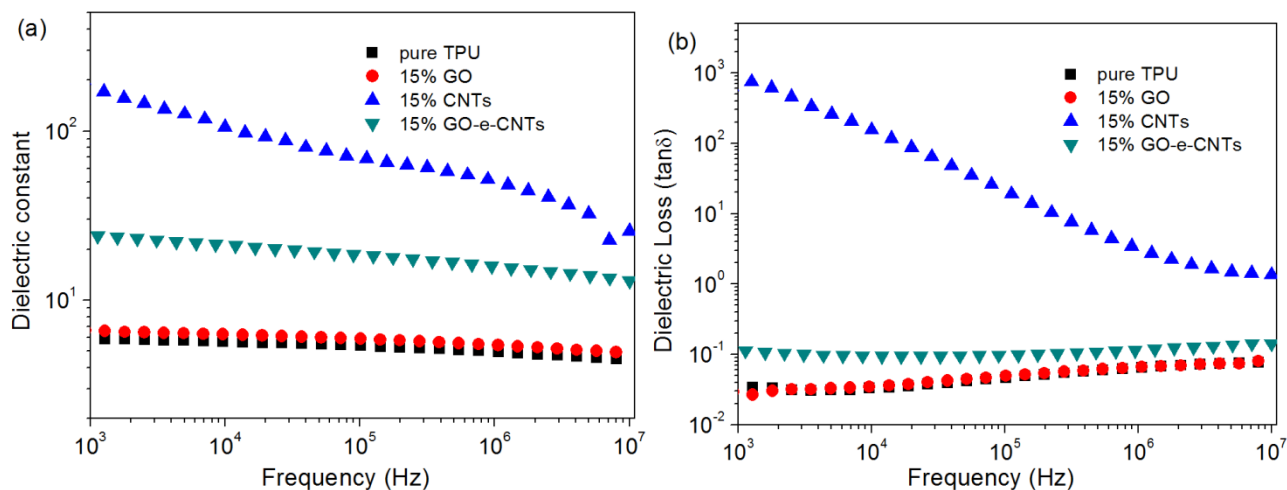

**Figure S7.** Frequency-dependent dielectric constant (a) and dielectric loss tangent (b) of the composites with CNT, GO, and GO-e-CNTs.

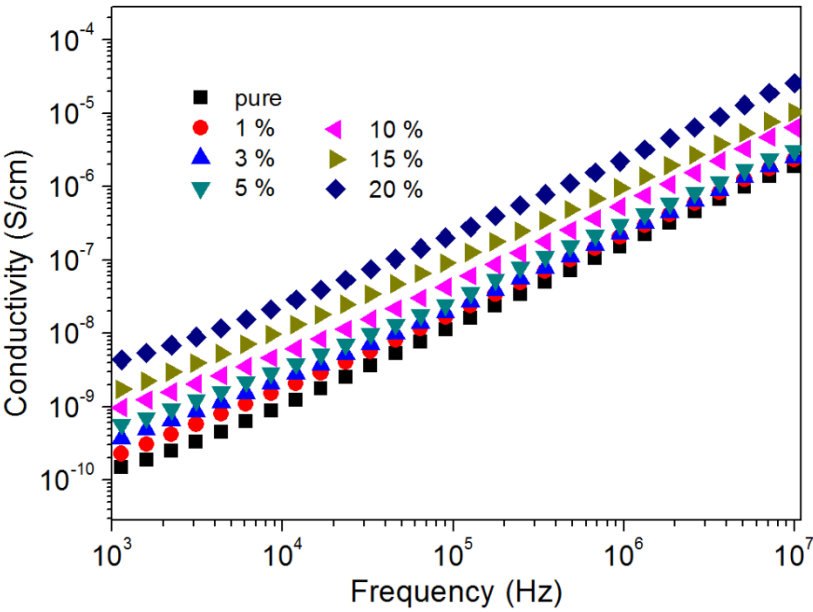

**Figure S8.** Frequency-dependent electrical conductivity of the GO-e-CNT composites with various loadings of CNT from  $10^3$  to  $10^7$  Hz.

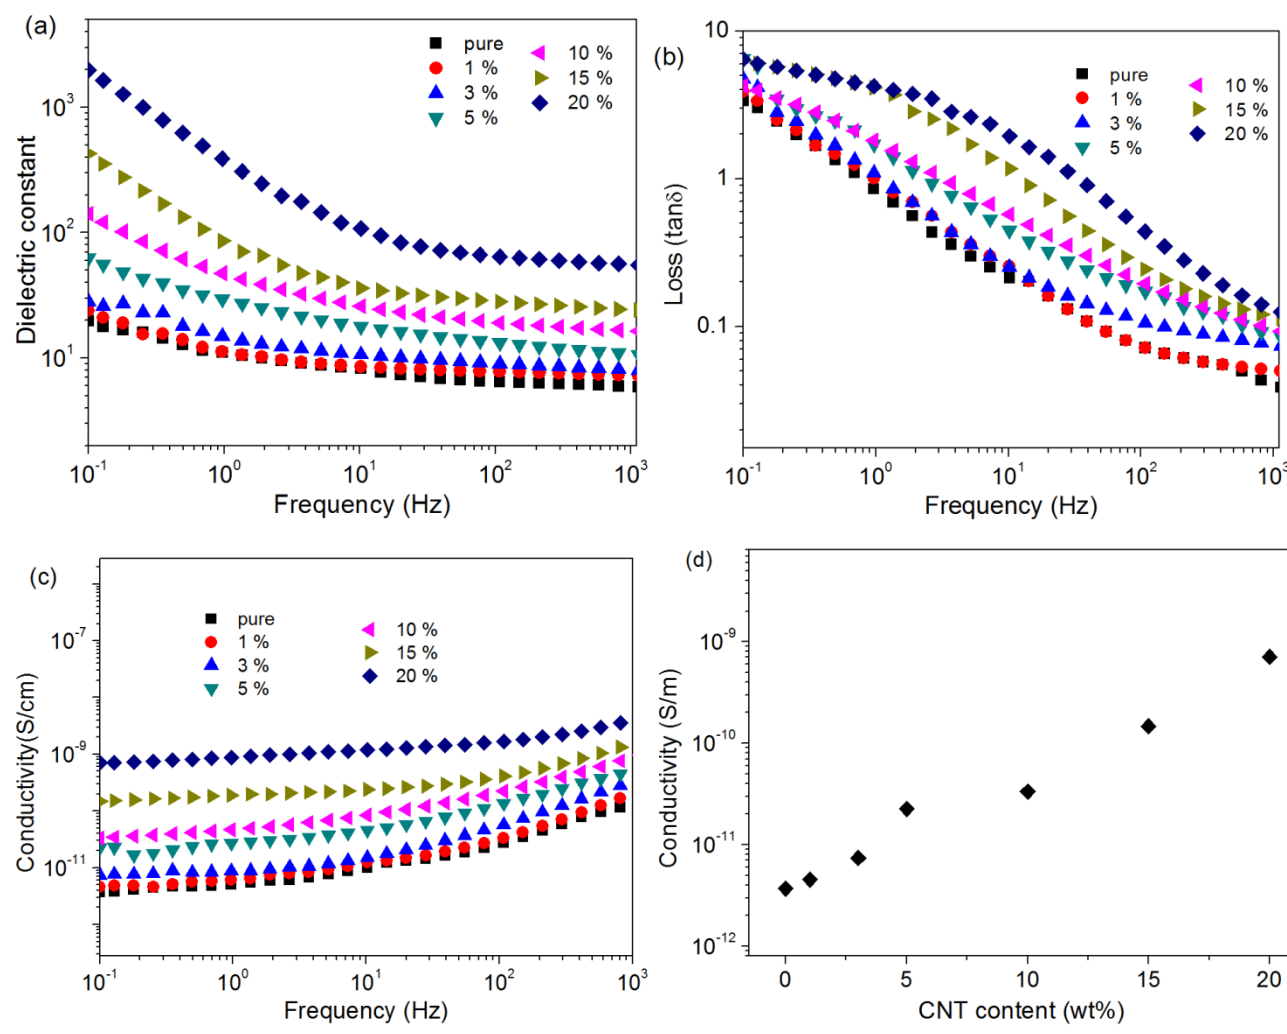

**Figure S9.** Frequency-dependent dielectric constant (a), dielectric loss tangent (b) and conductivity (c) of the composites as a function of the GO-e-CNT loading from 0.1 to  $10^3$  Hz; (d) Variation of electrical conductivity (b) of the GO-e-CNT/PU composite films as a function of the mass fraction of CNTs at 0.1 Hz.
